# Supplementary material for: U1snRNP-mediated suppression of polyadenylation in conjunction with the RNA structure controls poly (A) site selection in foamy viruses
Source: PubMed Central journal article supplement (PMC3694450; doi:10.1186/1742-4690-10-55), 2013-05-29
Supplement: 1742-4690-10-55-S1.pdf [file 1742-4690-10-55-S1.pdf]

## Supplementary materials

Since the data on the location of PFV polyadenylation site and on the sequences of the R-region were unclear, we sought to confirm both the polyadenylation site and R-region of the proviral plasmid pHSRV. The R-region was sequenced from several plasmids including an original stock of pHSRV13 obtained from M. Löchelt (DKFZ, Heidelberg). The sequences showed an additional cg-dinucleotide at position +6. This defines the position of the MSD at nucleotide +53.

In order to determine the polyadenylation site of PFV a RT-reaction was performed using RNA from PFV infected BHK cells and Oligo d(T) as anti-sense primer. The cDNA were amplified by PCR with Oligo d(T) and the primer +1. The PCR amplicon was sequenced and the polyadenylation site determined at position +193 in the 5' LTR.

The reporter constructs were cloned by amplifying the PFV LTR from pHSRV13 by PCR with the primers 5'LTR *KpnI* and 3'LTR *XhoI*. The PCR product was digested with *KpnI/XhoI* and cloned into the pre-digested pGL3 vector.

The MSD or poly(A) signal mutants were constructed by site directed mutagenesis using the 5'LTR *KpnIs*, 3'LTR *XhoI*, p(A)mnt(a/s), and SD2/4(a/s) primers.

The U1snRNA mutant was cloned by PCR mutagenesis using a reverse primer including a *BamHI* restriction site (rv: 5'-CGC GGA TCC TCC ACT GTA GGA TTA AC-3') and a forward primer containing the U1 mutation flanked by a *BglII* restriction site (fw: 5'-GCC CGA AGA TCT CAT ACT GAC CTG-3'). The PCR product was cloned as a *BamHI/BglII* fragment into the pUC19 U1wt plasmid (kindly provided by A. Weiner, Seattle, USA).

The U3 promoter was exchanged with the CMV i.E. promoter by digesting pHSRV2 with *NruI*, followed by a fill-in reaction using Klenow enzyme and a second digest with *SacI*. The CMV promoter fragment was ligated into the *Acc65I*/blunt & *SacI* digested pGL3-PFV LTR vector.

The nucleotide sequences of all constructs were determined with the 3'LTR *XhoI* primer.

### Primers

|                    |                                        |
|--------------------|----------------------------------------|
| 3'LTR <i>XhoI</i>  | TTTCTCGAGTGTTCATGGAATTTTGTATATTGATTATC |
| 5'LTR <i>KpnIs</i> | AAAGGTACCTGTGGTGGGAATGCCACTAGAACTAGG   |
| +1                 | GAGCTCTTCACTACTCGCTGCGTCCG             |
| SD2s               | TCTCAAGGTTTGGTCAGAAATATTTTATATG        |
| SD2 as             | AATATTTCTGACCAAACCTGGAGAGTCTCG         |
| SD4s               | TCTCCAGGTCAGGTAAGTATTATTTTATATTG       |
| SD4 as             | AAATAACTTACCTGACCTGGAGAGTCTCGTAC       |
| P(A)mnt s          | GTTAATCTAATAACCGACTTGATTTCGAGAACC      |
| P(A)mnt as         | AATCAAGTCGGTTATTAGATTAACAAGAAAACC      |

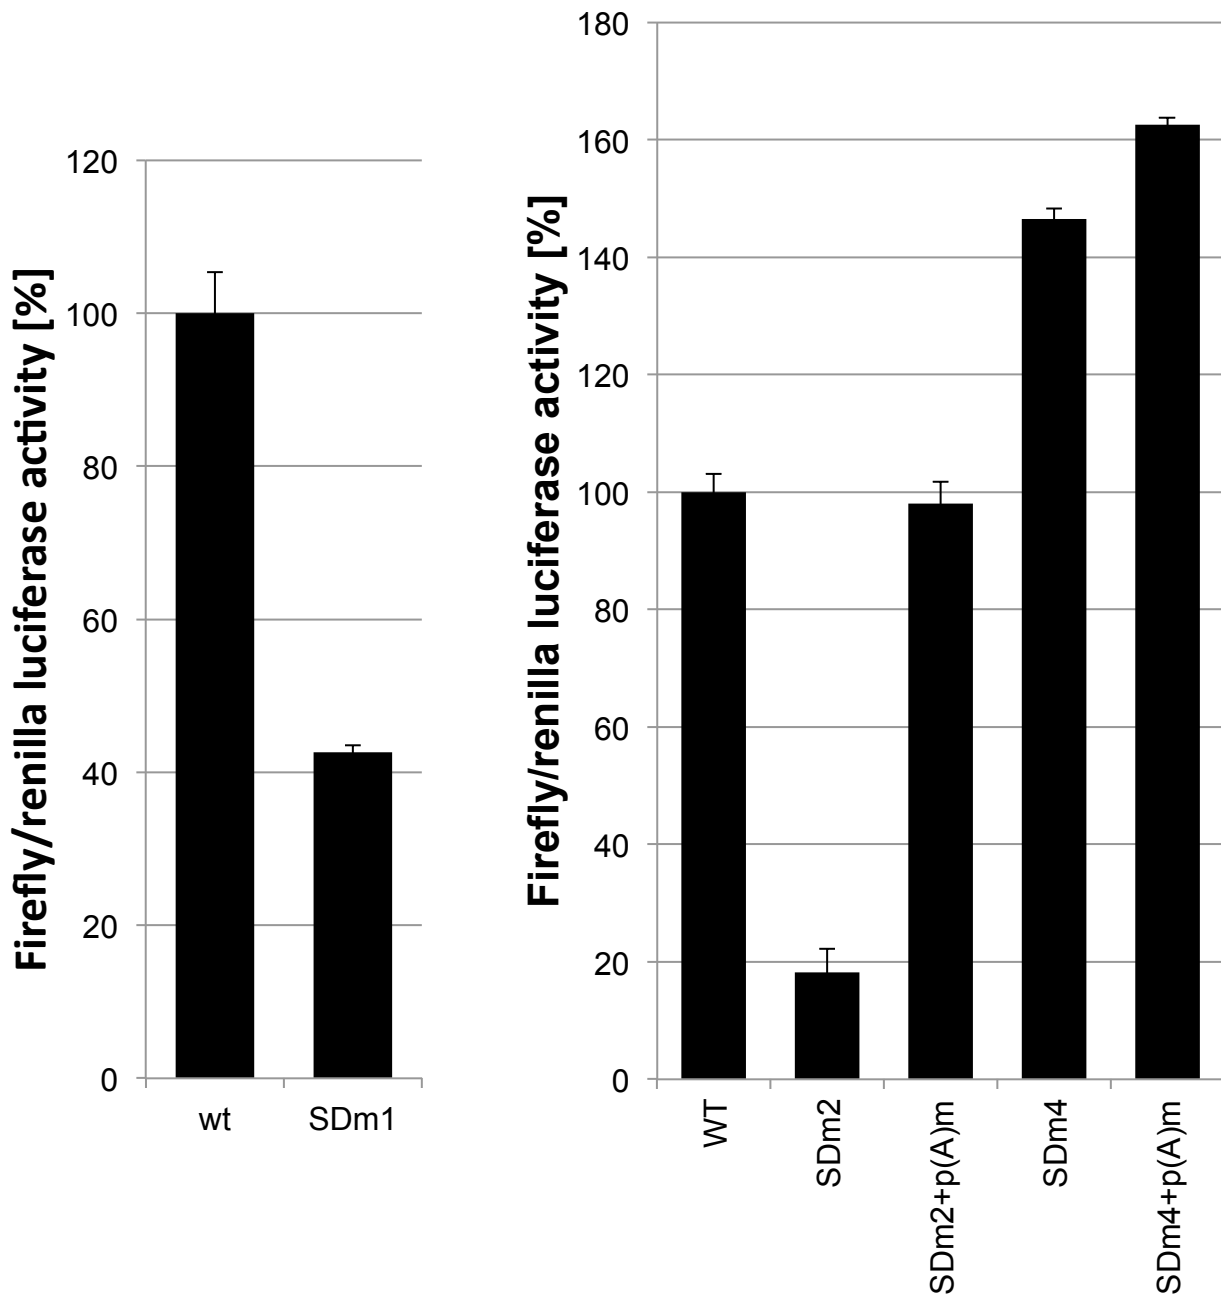

**Figure S1: SDm4 suppresses polyadenylation at the LTR poly(A) site efficiently.** Luciferase assay of pGL3-LTR derivatives. BHK-21 cells were co-transfected with pGL3-LTR derivatives, a Tas expression plasmid and a CMV-driven Renilla-luciferase expression plasmid. Luciferase expression was measured 2d after transfection. The bars represent the mean of 3 independent experiments. The error-bars indicated the calculated standard deviation. The experiment was repeated six times.

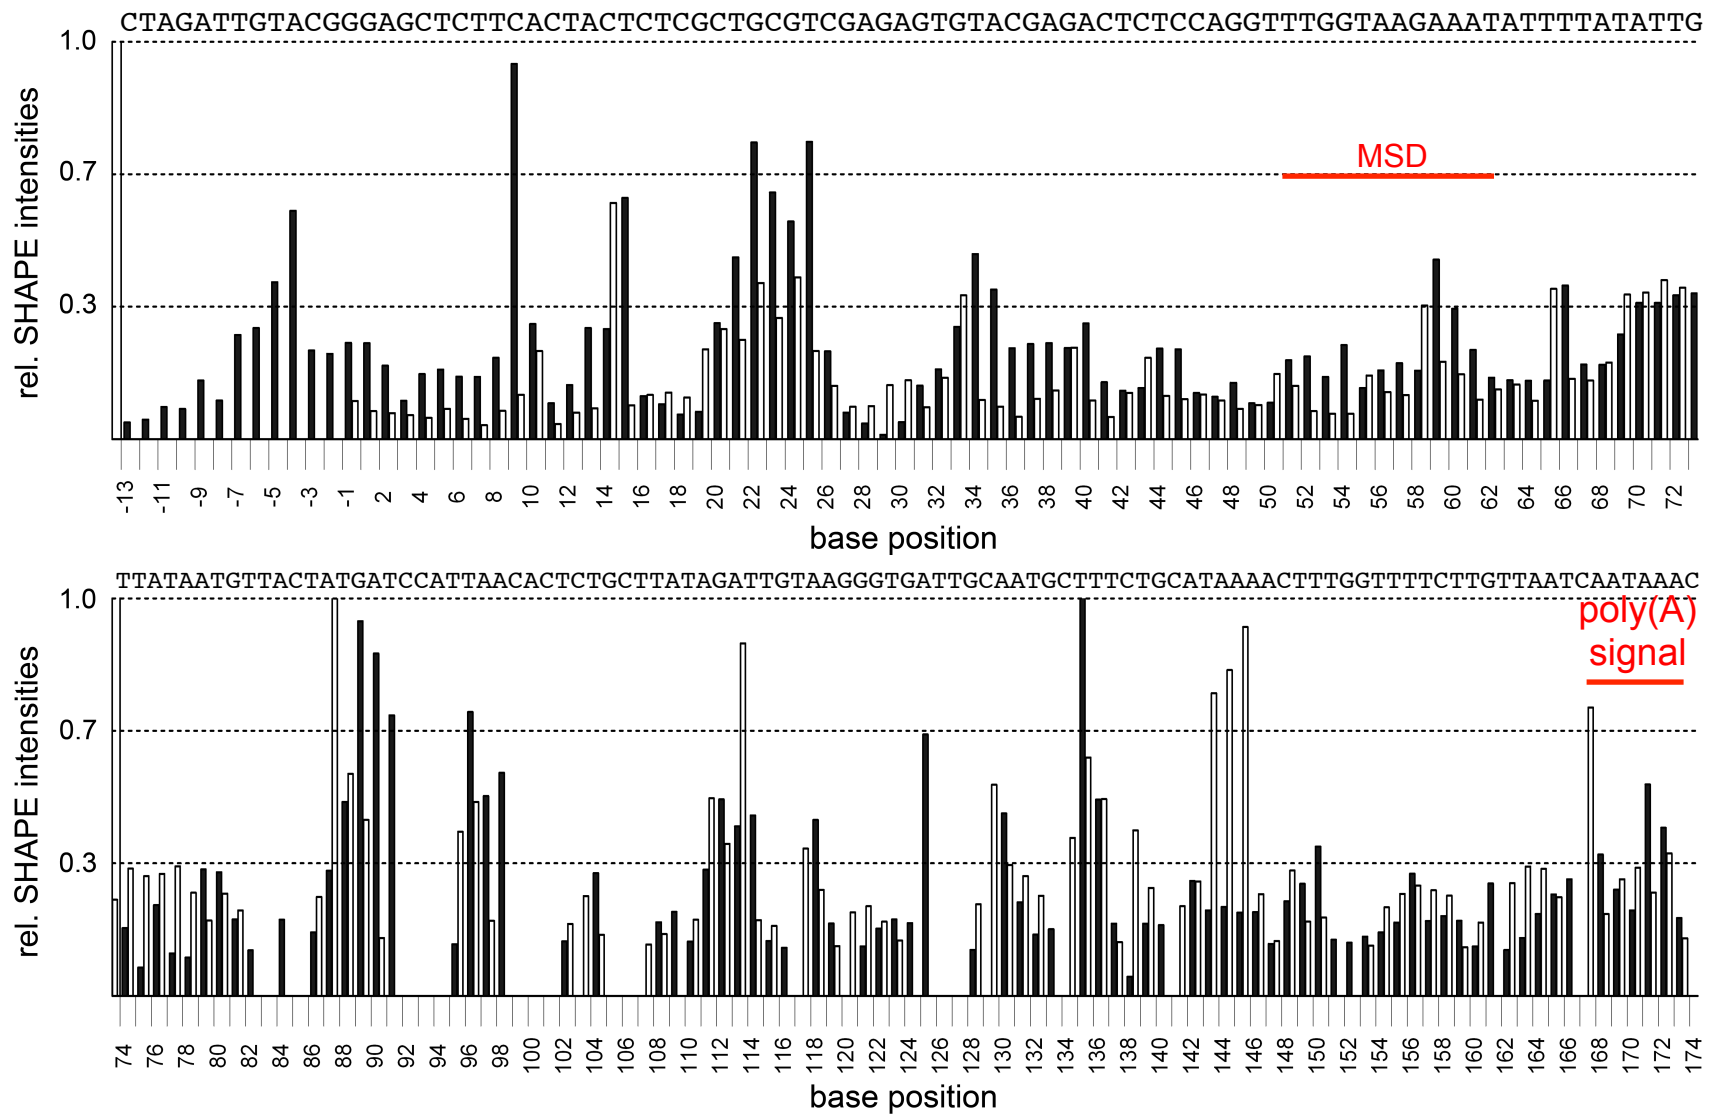

**Figure S2: Relative SHAPE intensities as a function of base position.** The 5'LTR intensities are shown in white, the 3'LTR intensities in black bars. Bases with intensities higher than 0.3 were assumed not to be paired. The data are derived from a single SHAPE experiment. The experiment was repeated twice. The positions of the MSD and polyadenylation signal are indicated.

A

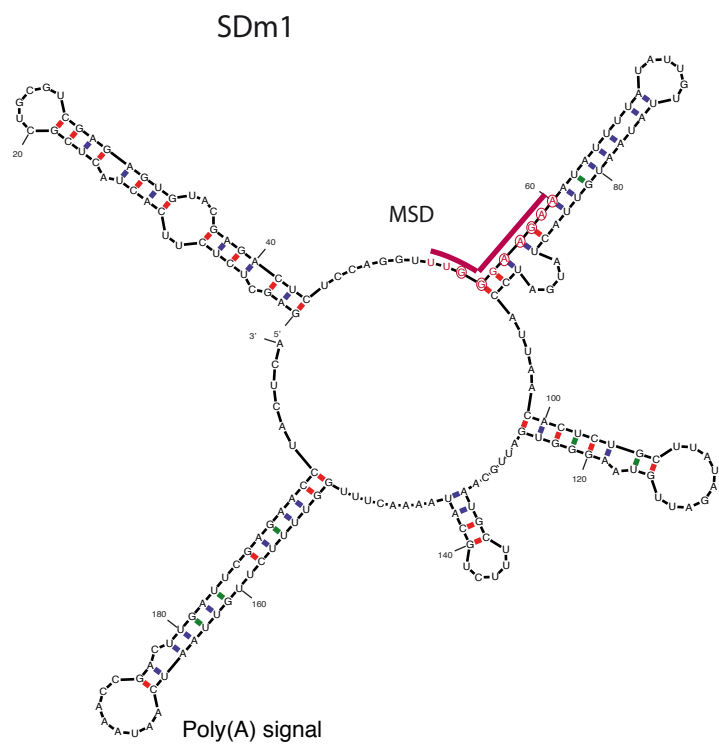

B

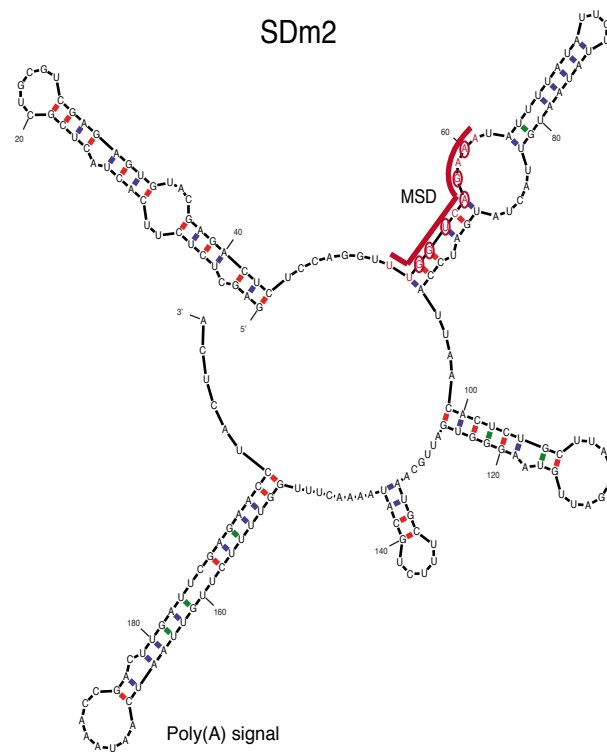

C

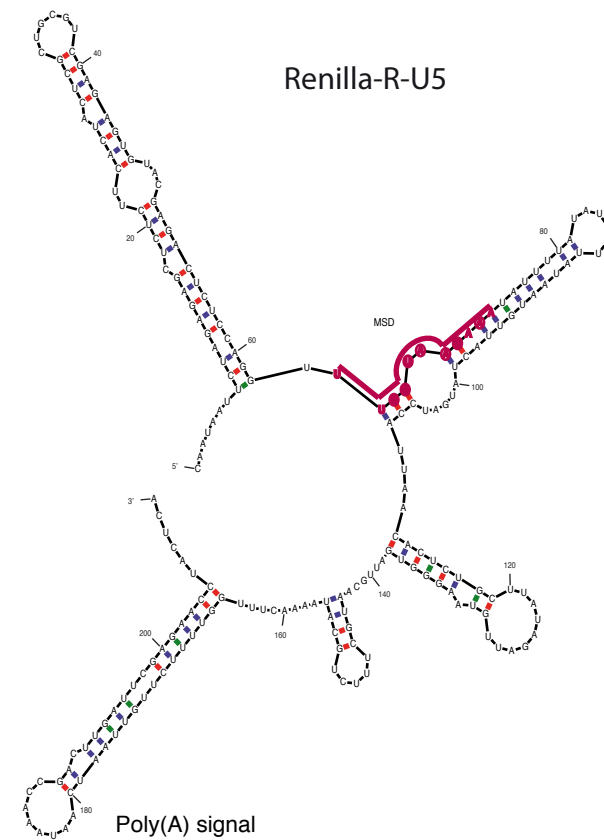

Figure S3: Calculated RNA structures of (A) SDm1, (B) SDm2, and (C) the Renilla luciferase-R-U5 construct using the constrains from the RNA SHAPE analyses (Figure 7)
